# Supplementary material
Source: PubMed Central journal article supplement (PMC7229646)
Supplement: pnas.1913603117.sd02.pdf [file pnas.1913603117.sd02.pdf]

S2 TTGAAATTGATAGACAAAGCGGATAGACGAAAGGAATACAAAAGGACTCTGTTGATGGAGTGGTGGTTCGCAATAAACGAAAGGGGATAAGTAATAGACTGACTGACGCGGAATCCACGAGAACGCTTCGTTCTCTCGCATCTTTCCCCCTACTCTATTACATACCCTGTTTCAGCTGATAAGATCGCTCTATTTT 2192

R1 CCCTTACATTTTATGCTATTATTTCAAANAATCAGCCCCAGGGAGTCTTCGTTGATCAGTTGGATCCATTTTGCAAAGAGGAAACCAACAGAGCATTCAAIGTGCCTTAGATTGTGGAACTTTTTCAACTTGCATATAAACTGATCACCTAAACAAAGTTTTATTTTACTCCAGAGAAATATAAATCAAAC 2399

R1 AAAAATTACCCTGTAAATTTAATTTTTGTAGGGTTTCAGTAATTTATCGCAAGTATGTAAGTGCACAATCCTAGCAACTTGGAAATGCTCTGGTTCCTTTGTGCAAAATGCAGTCCACTTATTTGGTATTAAAAACGGTCCGGAAAGGGGATTTTCACGTCACGTGCATTAAGCTCAGCTTGCCTTT 2599

R1 CGTAATGCAAAAGTTGCATAATTTAAATGAAATTTTTATGTTATATAGTAGTATTGAGTATTGAGTATGAGTATGAGACTTGCATCGAATTTCCGAAATATACCCTAAAATTTAAAGAGAAATCAGGAATTTTCAAAGTTTAAAGTGTACATTTCCCGGAAAACAACTATCAGAGGAATGAGAAAAGCA 2799

R1 GCGGAGATTTCAATGTAACGAACAAGGACGTTTTTCGAGTGGCCATTCGTTTTACCAGATCGCCTTGTCTGAAAGAAAACGTCGTATGGAAATATGGCCTGTCAAACCTTGTAGTAGATACGTGATTTCTCAATATTTATGCGTAATTTACCACAAATTTCCAGAAATCATTACAGTGCCTTAT 2999

R1 AATTAACGGAGCCTTTGGAGAAAATATCATGTCGTATATATGAAATAAACCTTTGTCAGAGGAAATTTGGCAACGTTCCGGATATATTTAAACGTTCCGTTCCGCGTTTTCTTCCATGACGCGAGTGGACTCGCCGC 3199



R5 TCCGTTTAAAAAATAGATATGGCAGGAAGTCTGCAACCGCAGCTGCAAAACCGAGTTACCGACTTACACCGTCGATATGTCCACCAAGAGTGGTAAAAATGGIATGAGGAATAAGGATGCTTCAAACGATGTAGCAGCTGTATAAGATTATTCAGCTTTGGCTGTATGATGGTACTAAAAAACTATGTTTCATTTT 4396

R1 ATATCATAATGTTGGGAATTTCCACGATGTTCCCCCTTGAAACTTGATAATTTTAAATTTTATAAATTTTGAACCCCTGCTTGTACGACCCAAATGGAGCATTGGCAAAACATAGATTAATTCGTCCTATTGAATTAATAAATAAAAAAACCTTTTAGAACAAITTTGTTTTGTAATGTTCCGTCGGTAAGA 4598

R1 AACCTCAGACTGGGATATTTTACACTCGGGTCTGTACAAAAGCTGCTTTATTTACAATCCTCTCCACTTGGAAACCTCAGTTCAAAAACGAGGTGTAAAAATCGGGCTGGAGTCTATATAGCGCCCAAAACACCAAGTATATGGATACGAAGTGGAAATAGCACCGTAAAAGCGTATATGACACCCCGCAAAA 4798

R1 AGAGTAGATTTCCGTCGATAAAAAGTGTCTCTGCATTCATCTCACTCGGGGGTTTGGGGCGCTACATGATTCGGCGCAGGATTTCACTTCGAAATTTTAAACAGTCGAGACCTGATATTAACGTATAATGAGTCAGTTGCAAACTTGATCAAGTGGAGTAGAAATAACAAGGATTTTCATATGGGAGAGGGGAATGG 4998

R1 CTCAAAATTAACGATGAGGGCATTTCCAATGTCTAAAATAGGTAACCTCCCCGCATGAGAAATAAATCCTGAAACTGGATTCACACGACAGTGGCGTGGCAGCCTACTTTGGGATATATTGATGATCTGCCATTTAAACCTTAGAAGAGGGTGTTCACAAACAAACGCCCTTAATAATCGATTCCTTACCACGCTTCA 5198

R1 AACGGGGAATAACATCGATAATCGATCATTCAACCTCCGAATTAAGTCTGCAAGCCGAGGCTGTAAGTTTTCTGTAATAATGTTATGTAAACATGATTCAAGTGGACCGACTAATCTGCACCGCTCGTATTTACCACACTTCCCTTTATCTCGTCAACCGAGGGTAAAACCTGTCAAAGTGTGCACCTCGAAATG 5398
