# Supplementary material
Source: PubMed Central journal article supplement (PMC7229646)
Supplement: pnas.1913603117.sd04.pdf [file pnas.1913603117.sd04.pdf]

# Analysis the sequences of nAChR-α6 in IMR and IMS strain

IMR-1 MIRADSYFVLVLMTOFGDS OGRHERLLDKLLDSYNVLERPVANESAALLVRF SITLQOIIDVDEKNQILTTNAWNLEWVDYSLGNSSDYGGVKDLRI PPRVWKPDILMYSNADEKFDGTFHTNVLVRN GTCCLY 140  
IMR-2 MIRADSYFVLVLMTOFGDS OGRHERLLDKLLDSYNVLERPVANESAALLVRF SITLQOIIDVDEKNQILTTNAWNLEWVDYSLGNSSDYGGVKDLRI PPRVWKPDILMYSNADEKFDGTFHTNVLVRN GTCCLY 140  
IMR-3 MIRADSYFVLVLMTOFGDS OGRHERLLDKLLDSYNVLERPVANESAALLVRF SITLQOIIDVDEKNQILTTNAWNLEWVDYSLGNSSDYGGVKDLRI PPRVWKPDILMYSNADEKFDGTFHTNVLVRN GTCCLY 140  
IMR-4 MIRADSYFVLVLMTOFGDS OGRHERLLDKLLDSYNVLERPVANESAALLVRF SITLQOIIDVDEKNQILTTNAWNLEWVDYSLGNSSDYGGVKDLRI PPRVWKPDILMYSNADEKFDGTFHTNVLVRN GTCCLY 140  
IMR-5 MIRADSYFVLVLMTOFGDS OGRHERLLDKLLDSYNVLERPVANESAALLVRF SITLQOIIDVDEKNQILTTNAWNLEWVDYSLGNSSDYGGVKDLRI PPRVWKPDILMYSNADEKFDGTFHTNVLVRN GTCCLY 140  
IMR-6 MIRADSYFVLVLMTOFGDS OGRHERLLDKLLDSYNVLERPVANESAALLVRF SITLQOIIDVDEKNQILTTNAWNLEWVDYSLGNSSDYGGVKDLRI PPRVWKPDILMYSNADEKFDGTFHTNVLVRN GTCCLY 140  
IMS-1 MIRADSYFVLVLMTOFGDS OGRHERLLDKLLDSYNVLERPVANESAALLVRF SITLQOIIDVDEKNQILTTNAWNLEWVDYSLGNSSDYGGVKDLRI PPRVWKPDILMYSNADEKFDGTFHTNVLVRN GTCCLY 140  
IMS-2 MIRADSYFVLVLMTOFGDS OGRHERLLDKLLDSYNVLERPVANESAALLVRF SITLQOIIDVDEKNQILTTNAWNLEWVDYSLGNSSDYGGVKDLRI PPRVWKPDILMYSNADEKFDGTFHTNVLVRN GTCCLY 140  
IMS-4 MIRADSYFVLVLMTOFGDS OGRHERLLDKLLDSYNVLERPVANESAALLVRF SITLQOIIDVDEKNQILTTNAWNLEWVDYSLGNSSDYGGVKDLRI PPRVWKPDILMYSNADEKFDGTFHTNVLVRN GTCCLY 140  
IMS-5 MIRADSYFVLVLMTOFGDS OGRHERLLDKLLDSYNVLERPVANESAALLVRF SITLQOIIDVDEKNQILTTNAWNLEWVDYSLGNSSDYGGVKDLRI PPRVWKPDILMYSNADEKFDGTFHTNVLVRN GTCCLY 140  
IMS-6 MIRADSYFVLVLMTOFGDS OGRHERLLDKLLDSYNVLERPVANESAALLVRF SITLQOIIDVDEKNQILTTNAWNLEWVDYSLGNSSDYGGVKDLRI PPRVWKPDILMYSNADEKFDGTFHTNVLVRN GTCCLY 140

IMR-1 IPPGIEKSTCKIDITWFPFDQKCDMKFGSWYDGFQDLQKSEEGGDLSDFI PNGEWYLLGMPGKRNVLVYQCCPEPYVDITFQIQIRRTLYFFNLI VPCVLISSMALLGFTLPDPSGEKLT LGVTILLSTVFLN 280  
IMR-2 IPPGIEKSTCKIDITWFPFDQKCDMKFGSWYDGFQDLQKSEEGGDLSDFI PNGEWYLLGMPGKRNVLVYQCCPEPYVDITFQIQIRRTLYFFNLI VPCVLISSMALLGFTLPDPSGEKLT LGVTILLSTVFLN 280  
IMR-3 IPPGIEKSTCKIDITWFPFDQKCDMKFGSWYDGFQDLQKSEEGGDLSDFI PNGEWYLLGMPGKRNVLVYQCCPEPYVDITFQIQIRRTLYFFNLI VPCVLISSMALLGFTLPDPSGEKLT LGVTILLSTVFLN 280  
IMR-4 IPPGIEKSTCKIDITWFPFDQKCDMKFGSWYDGFQDLQKSEEGGDLSDFI PNGEWYLLGMPGKRNVLVYQCCPEPYVDITFQIQIRRTLYFFNLI VPCVLISSMALLGFTLPDPSGEKLT LGVTILLSTVFLN 280  
IMR-5 IPPGIEKSTCKIDITWFPFDQKCDMKFGSWYDGFQDLQKSEEGGDLSDFI PNGEWYLLGMPGKRNVLVYQCCPEPYVDITFQIQIRRTLYFFNLI VPCVLISSMALLGFTLPDPSGEKLT LGVTILLSTVFLN 280  
IMR-6 IPPGIEKSTCKIDITWFPFDQKCDMKFGSWYDGFQDLQKSEEGGDLSDFI PNGEWYLLGMPGKRNVLVYQCCPEPYVDITFQIQIRRTLYFFNLI VPCVLISSMALLGFTLPDPSGEKLT LGVTILLSTVFLN 280  
IMS-1 IPPGIEKSTCKIDITWFPFDQKCDMKFGSWYDGFQDLQKSEEGGDLSDFI PNGEWYLLGMPGKRNVLVYQCCPEPYVDITFQIQIRRTLYFFNLI VPCVLISSMALLGFTLPDPSGEKLT LGVTILLSTVFLN 280  
IMS-2 IPPGIEKSTCKIDITWFPFDQKCDMKFGSWYDGFQDLQKSEEGGDLSDFI PNGEWYLLGMPGKRNVLVYQCCPEPYVDITFQIQIRRTLYFFNLI VPCVLISSMALLGFTLPDPSGEKLT LGVTILLSTVFLN 280  
IMS-4 IPPGIEKSTCKIDITWFPFDQKCDMKFGSWYDGFQDLQKSEEGGDLSDFI PNGEWYLLGMPGKRNVLVYQCCPEPYVDITFQIQIRRTLYFFNLI VPCVLISSMALLGFTLPDPSGEKLT LGVTILLSTVFLN 280  
IMS-5 IPPGIEKSTCKIDITWFPFDQKCDMKFGSWYDGFQDLQKSEEGGDLSDFI PNGEWYLLGMPGKRNVLVYQCCPEPYVDITFQIQIRRTLYFFNLI VPCVLISSMALLGFTLPDPSGEKLT LGVTILLSTVFLN 280  
IMS-6 IPPGIEKSTCKIDITWFPFDQKCDMKFGSWYDGFQDLQKSEEGGDLSDFI PNGEWYLLGMPGKRNVLVYQCCPEPYVDITFQIQIRRTLYFFNLI VPCVLISSMALLGFTLPDPSGEKLT LGVTILLSTVFLN 280

IMR-1 LVAESMPTTSDAVPLIGTYFNCIMFVASSVVLTVLVLNYHHRTPENHKMSGFVQKLFLEYLPWVLRMRGP GKKITLTKTISISHRMRELEIRERSRSLLANILD DDDLQRF RANVNNSTNTTCHQRQGH TVSQSVDET 420  
IMR-2 LVAETLPQVSDAIPLEIGTYFNCIMFVASSVVLTVLVLNYHHRTPENHKMSGFVQKLFLEYLPWVLRMRGP GKKITLTKTISISHRMRELEIRERSRSLLANILD DDDLQRF RANVNNSTNTTCHQRQGH TVSQSVDET 420  
IMR-3 LVAETLPQVSDAIPLEIGTYFNCIMFVASSVVLTVLVLNYHHRTPENHKMSGFVQKLFLEYLPWVLRMRGP GKKITLTKTISISHRMRELEIRERSRSLLANILD DDDLQRF RANVNNSTNTTCHQRQGH TVSQSVDET 420  
IMR-4 LVAETLPQVSDAIPLEIGTYFNCIMFVASSVVLTVLVLNYHHRTPENHKMSGFVQKLFLEYLPWVLRMRGP GKKITLTKTISISHRMRELEIRERSRSLLANILD DDDLQRF RANVNNSTNTTCHQRQGH TVSQSVDET 420  
IMR-5 LVAETLPQVSDAIPLEIGTYFNCIMFVASSVVLTVLVLNYHHRTPENHKMSGFVQKLFLEYLPWVLRMRGP GKKITLTKTISISHRMRELEIRERSRSLLANILD DDDLQRF RANVNNSTNTTCHQRQGH TVSQSVDET 420  
IMR-6 LVAETLPQVSDAIPLEIGTYFNCIMFVASSVVLTVLVLNYHHRTPENHKMSGFVQKLFLEYLPWVLRMRGP GKKITLTKTISISHRMRELEIRERSRSLLANILD DDDLQRF RANVNNSTNTTCHQRQGH TVSQSVDET 420  
IMS-1 LVAESMPTTSDAVPLIGTYFNCIMFVASSVVLTVLVLNYHHRTPENHKMSGFVQKLFLEYLPWVLRMRGP GKKITLTKTISISHRMRELEIRERSRSLLANILD DDDLQRF RANVNNSTNTTCHQRQGH TVSQSVDET 420  
IMS-2 LVAESMPTTSDAVPLIGTYFNCIMFVASSVVLTVLVLNYHHRTPENHKMSGFVQKLFLEYLPWVLRMRGP GKKITLTKTISISHRMRELEIRERSRSLLANILD DDDLQRF RANVNNSTNTTCHQRQGH TVSQSVDET 420  
IMS-4 LVAETLPQVSDAIPLEIGTYFNCIMFVASSVVLTVLVLNYHHRTPENHKMSGFVQKLFLEYLPWVLRMRGP GKKITLTKTISISHRMRELEIRERSRSLLANILD DDDLQRF RANVNNSTNTTCHQRQGH TVSQSVDET 420  
IMS-5 LVAESMPTTSDAVPLIGTYFNCIMFVASSVVLTVLVLNYHHRTPENHKMSGFVQKLFLEYLPWVLRMRGP GKKITLTKTISISHRMRELEIRERSRSLLANILD DDDLQRF RANVNNSTNTTCHQRQGH TVSQSVDET 420  
IMS-6 LVAESMPTTSDAVPLIGTYFNCIMFVASSVVLTVLVLNYHHRTPENHKMSGFVQKLFLEYLPWVLRMRGP GKKITLTKTISISHRMRELEIRERSRSLLANILD DDDLQRF RANVNNSTNTTCHQRQGH TVSQSVDET 420

IMR-1 AMCSIAQREMQRHLRELRFITGRLRKKDEAEVSDWKFAAM 462  
IMR-2 AMCSIAQREMQRHLRELRFITGRLRKKDEAEVSDWKFAAM 462  
IMR-3 AMCSIAQREMQRHLRELRFITGRLRKKDEAEVSDWKFAAM 462  
IMR-4 AMCSIAQREMQRHLRELRFITGRLRKKDEAEVSDWKFAAM 462  
IMR-5 AMCSIAQREMQRHLRELRFITGRLRKKDEAEVSDWKFAAM 462  
IMR-6 AMCSIAQREMQRHLRELRFITGRLRKKDEAEVSDWKFAAM 462  
IMS-1 AMCSIAQREMQRHLRELRFITGRLRKKDEAEVSDWKFAAM 462  
IMS-2 AMCSIAQREMQRHLRELRFITGRLRKKDEAEVSDWKFAAM 462  
IMS-4 AMCSIAQREMQRHLRELRFITGRLRKKDEAEVSDWKFAAM 462  
IMS-5 AMCSIAQREMQRHLRELRFITGRLRKKDEAEVSDWKFAAM 462  
IMS-6 AMCSIAQREMQRHLRELRFITGRLRKKDEAEVSDWKFAAM 462
